# Supplementary material for: Demonstration of a quantum error detection code using a square lattice of four superconducting qubits
Source: PubMed Central journal article supplement (PMC4421819; doi:10.1038/ncomms7979), 2015-04-29
Supplement: ncomms7979-s1.pdf [file ncomms7979-s1.pdf]

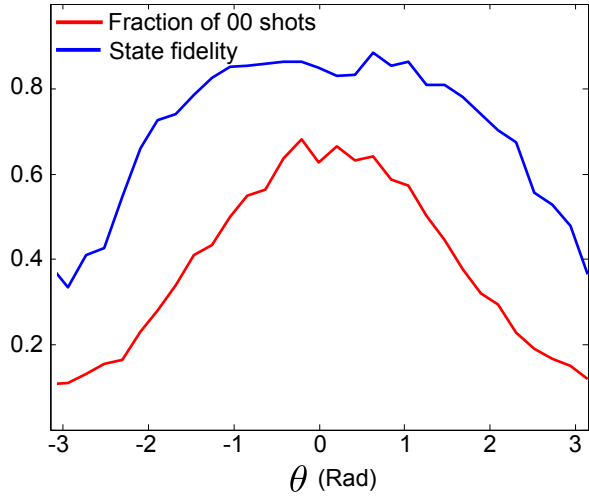

Supplementary Figure 1. **Fidelity and Error Angle. a.** Fidelity and fraction of down-down shots as a function of bit error angle.

Supplementary Table 1. Assignment fidelities of the readout channels

| $M_1$  | $M_2$  | $M_3$  | $M_4$  |
|--------|--------|--------|--------|
| 0.9592 | 0.9476 | 0.9416 | 0.9646 |

Supplementary Table 2. State Reconstruction Parameters for Different Error Types

| Error | Raw Fidelity | Fidelity | Var(Fidelity) | Physicality |
|-------|--------------|----------|---------------|-------------|
| None  | 0.8490       | 0.8491   | 0.0018        | 0           |
| X     | 0.8194       | 0.8195   | 0.0021        | 0           |
| Y     | 0.8152       | 0.8148   | 0.0022        | 0           |
| Z     | 0.8047       | 0.8046   | 0.0019        | 0           |
